# Supplementary material
Source: PubMed Central journal article supplement (PMC7079671)
Supplement: NIHMS1035440-supplement-Supplemental_Material.pdf [file NIHMS1035440-supplement-Supplemental_Material.pdf]

**Online Supplemental Materials I**  
**Generic latent change score model figure**

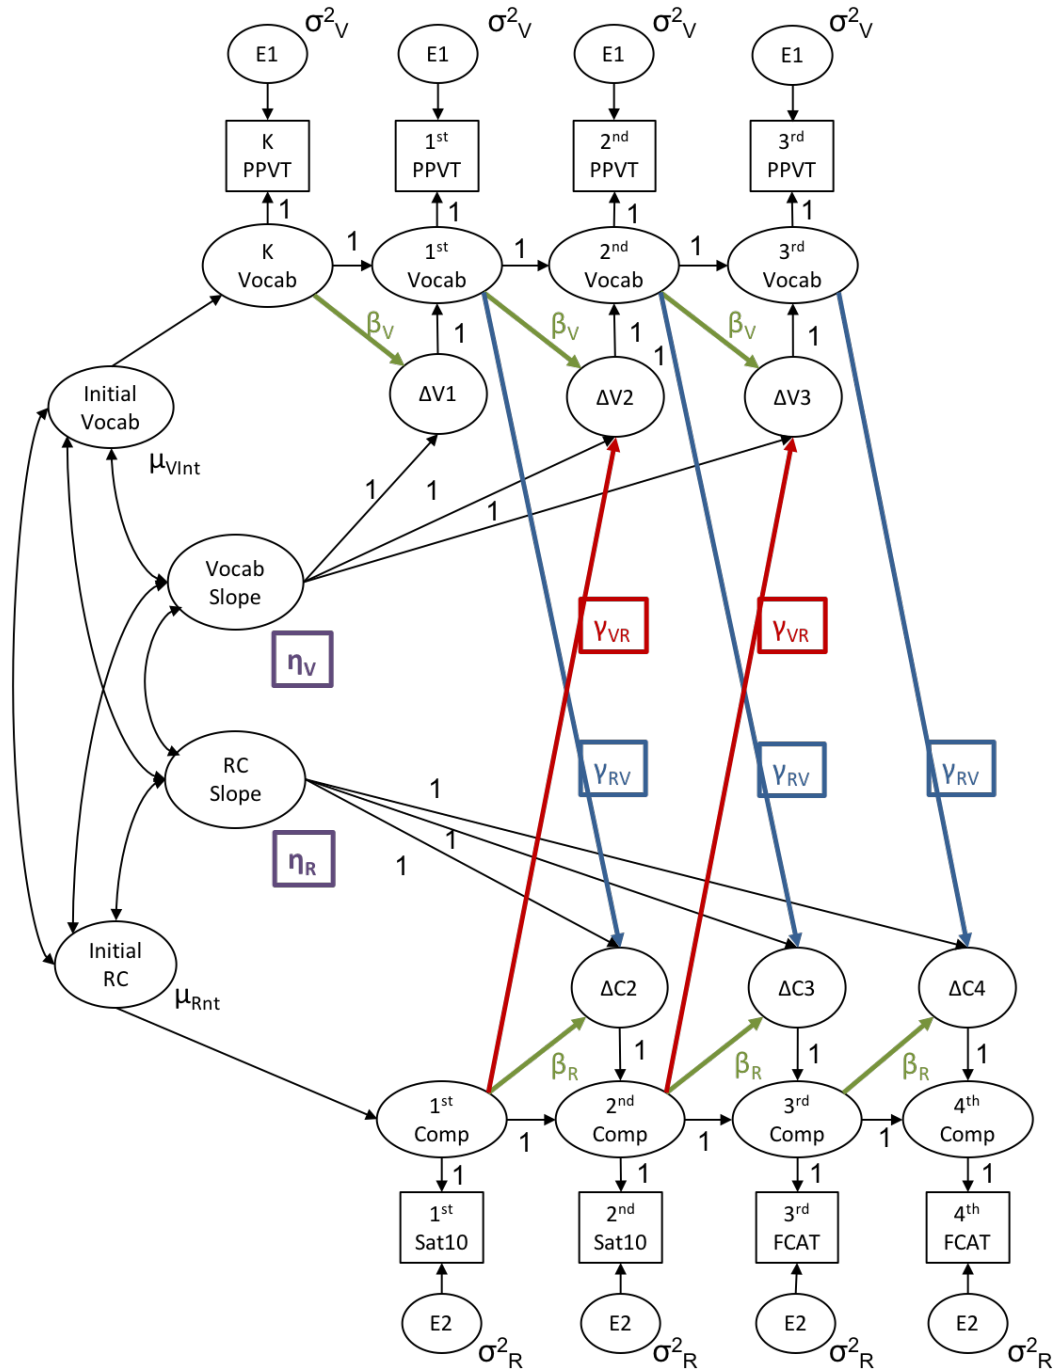

**Figure S1a.** Generic latent change score model figure.

Presented in *Figure S1a* is a generic latent change score model figure. The latent variables at each time are indicated perfectly (at 1) by the measured variables at that time. This allows the true score to be separated from an error term ( $E1, E2$ ). The error terms are constrained

over time as a form of measurement invariance. Additionally, and not picture in the figure, the intercepts of each latent variable are constrained to zero and their variances are constrained to 1.

Change is a function of three independent sources: constant change ( $\eta$ ), proportional change term ( $\beta$ ), and the cross-lagged change ( $\gamma$ ). Constant change, represented by a slope term, gives the amount of expected time-point-to-time-point change. The proportional change coefficient indicates the level of carry-over effect specific to individuals; i.e., it estimates individual differences in how previous levels of an ability or skill influence the change in that ability or skill (auto-regression). Cross-lagged terms estimate if one variable is a leading indicator of change in the second variable.

We estimated four models with differing theoretical questions regarding the existence of the cross-lagged pathways separately for students with and without an LD. Our first model posited bidirectional relations, i.e., the red pathways indicated that comprehension was a leading indicator of change in vocabulary knowledge ( $\gamma_{VR}$ ), and the blue pathways indicated that vocabulary knowledge was a leading indicator of change in reading comprehension ( $\gamma_{RV}$ ). The second model removed the red pathways (by constraining their estimates to zero) and estimated only the blue pathways (vocabulary to change in reading comprehension). The third model removed the blue pathways (by constraining their pathways to zero) and estimated only the red pathways (reading comprehension to change in vocabulary). The fourth model removed both the red and blue pathways as way to estimate no cross-lagged influences.

**Online Supplemental Materials II**  
**Figures from the Multiple Group Models**

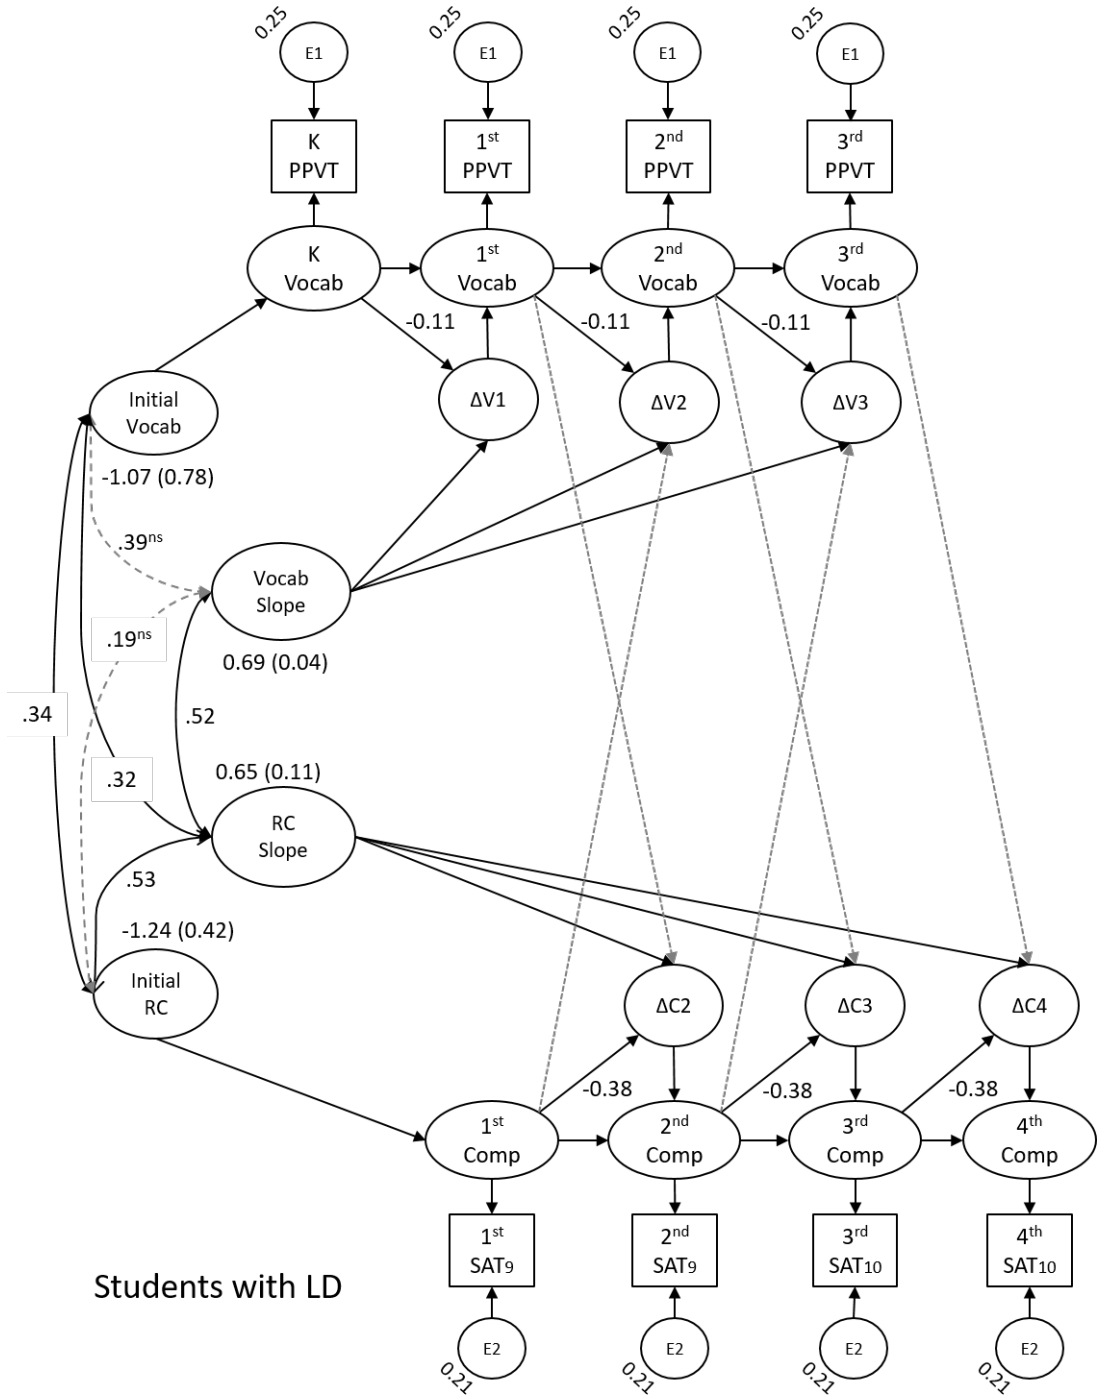

**Figure S2a.** Path diagram for the students with a learning disability. All parameters significant at  $p < .05$  unless otherwise specified. Ns = not significant. Dashed lines indicate the parameter was not significant. Unmarked pathways are estimated at 1 for model identification purposes. Not pictured: within time covariances between error terms across construct (e.g., SAT9 at 1<sup>st</sup> with PPVT at 1<sup>st</sup>).

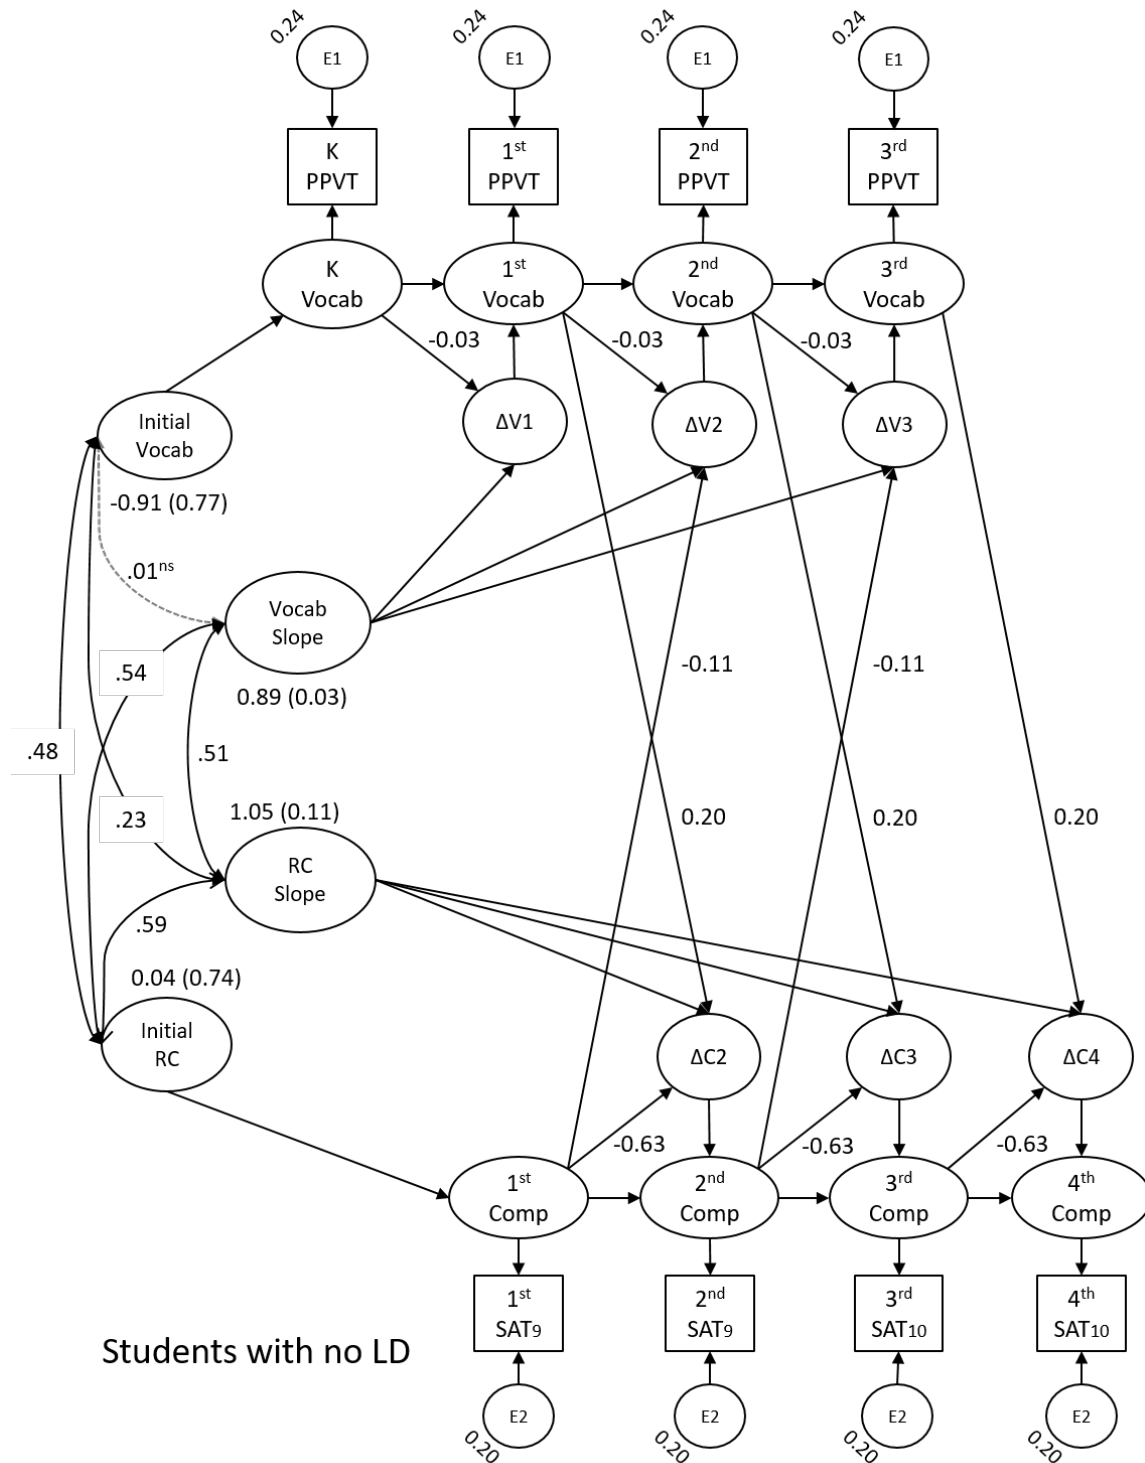

**Figure S2b.** Path diagram for the students with no learning disability. All parameters significant at  $p < .05$  unless otherwise specified. Ns = not significant. Dashed lines indicate the parameter is not significant. Unmarked pathways are estimated at 1 for model identification purposes. Not pictured: within time covariances between error terms across construct (e.g., SAT9 at 1<sup>st</sup> with PPVT at 1<sup>st</sup>).



```

        newdata[nrow(newdata), ],
        newdata[1, ])
newdata[c(1,nrow(newdata)-1,
         nrow(newdata)), 'x']
<- round(newdata[1, 'x'])
if (length(draw_quantiles) > 0 & !scales::zero_range(range(data$y))) {
  stopifnot(all(draw_quantiles >= 0),
            all(draw_quantiles <= 1))
  quantiles <- ggplot2:::create_quantile_segment_frame(data,
                                                       draw_quantiles)

  aesthetics <- data[rep(1, nrow(quantiles)),
                    setdiff(names(data),
                            c("x", "y")),
                    drop = FALSE]
  aesthetics$alpha <- rep(1,
                         nrow(quantiles))
  both <- cbind(quantiles,
               aesthetics)
  quantile_grob <- GeomPath$draw_panel(both, ...)
  ggplot2:::ggname("geom_split_violin",
                  grid::grobTree(GeomPolygon$draw_panel(newdata,
                                                         ...),
                                quantile_grob))
}
else {
  ggplot2:::ggname("geom_split_violin",
                  GeomPolygon$draw_panel(newdata, ...))
}
})

geom_split_violin <- function (mapping = NULL,
                              data = NULL,
                              stat = "ydensity",
                              position = "identity",
                              ...,
                              draw_quantiles = NULL,
                              trim = TRUE,
                              scale = "area",
                              na.rm = FALSE,
                              show.legend = NA,
                              inherit.aes = TRUE) {
  layer(data = data,
        mapping = mapping,
        stat = stat,
        geom = GeomSplitViolin,
        position = position,
        show.legend = show.legend,
        inherit.aes = inherit.aes,
        params = list(trim = trim,
                      scale = scale,

```

```

        draw_quantiles = draw_quantiles,
        na.rm = na.rm,
        ...))
}

####Violin plots per vocabulary----
violinLVoc = ggplot(small, aes(Time, LVoc, colour=Group))+
  scale_colour_manual(values=c("#00BFC4", "#F8766D"))

violinLVoc2<-violinLVoc+
  geom_split_violin(aes(group = interaction(Group, Time)),
    alpha=0.1,
    size=1.1,
    trim=FALSE) +

  xlab("Time Point") +
  ylab("Model Estimated Vocabulary Knowledge") +
  theme_bw() +
  geom_point(alpha = 0.4, size=0.6, fill=NA) +
  geom_jitter(width = 0.2, height = 0.2, size=0.6)

violinLVoc1 = violinLVoc2 + aes(group = factor(ID))

violinLVocPlot<- violinLVoc1 +
  geom_smooth(aes(group=Group),
    method="lm",
    size=1.5,
    alpha=0.3) +
  labs(title="Growth in Vocabulary Knowledge",
    subtitle="Model estimated growth in vocabulary
    knowledge grouped by LD status",
    x = "Time Point",
    fill="Group")
violinLVocPlot

png("VocPlot_Violin_Color.png",
  width = 8.5,
  height = 5.5,
  units = 'in',
  res = 300)
violinLVocPlot # Make plot
dev.off()

####Violin plots per reading comp----

violinRC = ggplot(small,
  aes(Time, LRC, colour=Group))+
  scale_colour_manual(values=c("#00BFC4", "#F8766D"))

violinRC2<- violinRC +

```

```

geom_split_violin(aes(group = interaction(Group, Time)),
                  alpha=0.1,
                  size=1.1,
                  trim=FALSE) +
xlab("Time Point") +
ylab("Model Estimated Reading Comprehension") +
theme_bw() +
geom_point(alpha = 0.4,
           size=0.6,
           fill=NA) +
geom_jitter(width = 0.2,
            height = 0.2,
            size=0.6)

violinRC1 = violinRC2 + aes(group = factor(ID))

violinRCPlot<- violinRC1 +
  geom_smooth(aes(group=factor(Group)),
             method="lm",
             size=1.5,
             alpha=0.3) +
  labs(title="Growth in Reading Comprehension",
       subtitle="Model estimated growth in reading comprehension grouped by L
D status",
       x = "Time Point",
       fill="Group")
violinRCPlot

png("RCPlot_Violin_Color.png",
    width = 8.5,
    height = 5.5,
    units = 'in',
    res = 300)
violinRCPlot # Make plot
dev.off()

####spaghetti plots per reading comp AND VOCAB----
spagRCVoc = ggplot(small, aes(LVoc, LRC, colour=Group)) +
  aes(group = factor(ID)) +
  geom_jitter() +
  ylab("Model Estimated Reading Comprehension") +
  xlab("Model Estimated Vocabulary Knowledge") +
  theme_bw() +
  scale_x_continuous(breaks=c(-3,-2,-1,0,1,2,3)) +
  scale_y_continuous(breaks=c(-3,-2,-1,0,1,2,3)) +
  scale_colour_manual(values=c("#00BFC4", "#F8766D"))

spagRCVocSpaghetti= spagRCVoc +
  geom_path(aes(group=ID),
           arrow=arrow(length=unit(0.35,"cm")))

```



```

spagRCVocSpaghetti

png("RCVocSpaghetti_Color.png",
    width = 8.5,
    height = 5,
    units = 'in',
    res = 300)
spagRCVocSpaghetti # Make plot
dev.off()

#####making true vector plot plus confidence ellipses----
#### make new subset of data ----

dat$ID <- 1:nrow(dat)
set.seed(38)
ld_subset <- dat %>%
  filter (ESE7 == "1")
ld_IDs <- unique(ld_subset$ID)
sampled_IDs <- sample(ld_IDs, 100)
LDselect<-dat %>%
  filter (ID %in% sampled_IDs)

no_subset <- dat %>%
  filter (ESE7 == "0")
no_IDs <- unique(no_subset$ID)
nosampled_IDs <- sample(no_IDs, 100)
noselect<-dat %>%
  filter (ID %in% nosampled_IDs)

smallvec<- rbind(noselect, LDselect)

#####for LD students----

#Creating matrix of model implied bivariate pairs
dimlength<-5
t1rcold<-seq(from = -2.5,to=1.5,
             length.out = dimlength)
t1vocld<-seq(from = -2.5,to=1,
             length.out = dimlength)
scorevecmut<-data.frame(rep(t1rcold,
                           times=dimlength))
scorevecmut$vocld<-rep(t1vocld,
                      each=dimlength)
colnames(scorevecmut)[1:2]<-c('t1rcold','t1vocld')

#Computing model implied scores at T2
scorevecmut$t2vocld<-
  scorevecmut$t1vocld+

```

```

0.69+
(-0.11*scorevecmut$t1vocld)+
(0*scorevecmut$t1rcold)

scorevecmut$t2rcold<-
scorevecmut$t1rcold+
0.65+
(-0.38*scorevecmut$t1rcold)+
(0*scorevecmut$t1vocld)

####for non-ld students----

dimlength<-5
t1rco<-seq(from = -2.5,to=1.5,
           length.out = dimlength)
t1voc<-seq(from = -2.5,to=1,
           length.out = dimlength)
scorevecmut$rc<-rep(t1rco,
                   times=dimlength)
scorevecmut$voc<-rep(t1voc,
                   each=dimlength)
colnames(scorevecmut)[9:10]<-c('t1rco', 't1voc')

#Computing model implied scores at T2
scorevecmut$t2voc<-
scorevecmut$t1voc+
0.89+
(-0.03*scorevecmut$t1voc)+
(-0.11*scorevecmut$t1rco)

scorevecmut$t2rco<-
scorevecmut$t1rco+
1.05+
(-0.63*scorevecmut$t1rco)+
(0.20*scorevecmut$t1voc)

####Plotting vector field----
g<-ggplot(smallvec,
          aes(PPVT3,
             SAT4),
          colour=factor(ESE7),
          show.legend=FALSE)+
geom_jitter(alpha=.7,
            size=3,
            aes(colour=factor(ESE7))),
            show.legend=FALSE)+
geom_segment(aes(x=t1voc,
                 y=t1rco,
                 xend=t2voc,
                 yend=t2rco),

```

```

    size=.8,
    arrow = arrow(length = unit(0.2,"cm")),
    data=scorevecmut,
    colour="#F8766D",
    show.legend=FALSE)+
geom_segment(aes(x=t1vocld,
                 y=t1rcold,
                 xend=t2vocld,
                 yend=t2rcold),
             size=.8,
             arrow = arrow(length = unit(0.2,"cm")),
             data=scorevecmut,
             colour="#00BFC4",
             show.legend=FALSE)+
xlab('Vocabulary Knowledge')+
ylab('Reading Comprehension')+
coord_cartesian(ylim = c(-2.8,1.9),
                xlim=c(-2.8,1.9))+
theme_bw(base_size = 19)+
theme(panel.grid.minor = element_blank()+
ylim(-3,3))+
stat_ellipse(aes(colour=factor(ESE7)),
             lty=2,
             show.legend=FALSE,
             level = 0.90,
             size=1.1)
g

##Plot Save options-----

#PNG high res
png("VocRC_Vector_Color.png",
    width = 11.5,
    height = 7.5,
    units = 'in',
    res = 600)
g # Make plot
dev.off()

```

## Online Supplemental Materials IV

### PPVT Scores Grouped by LD Status and FRL Status

**Table S4.**

*PPVT Scores Grouped by LD Status and by FRL Status*

| <u><b>FRL Status</b></u> | PPVT Scale Scores |            |          |         | Group Comparison |                |                   |
|--------------------------|-------------------|------------|----------|---------|------------------|----------------|-------------------|
|                          | <i>n</i>          | No LD mean | <i>n</i> | LD mean | <i>t-test</i>    | <i>p-value</i> | <i>comparison</i> |
| Did Not Apply            | 2463              | 103.48     | 76       | 97.01   | 4.28             | < .001         | No LD > LD        |
| Denied                   | 405               | 100.45     | 9        | 95.56   | 1.41             | .197           | No LD = LD        |
| Reduced                  | 1053              | 98.44      | 43       | 91.14   | 3.75             | < .001         | No LD > LD        |
| Free                     | 4932              | 92.71      | 245      | 85.71   | 8.16             | < .001         | No LD > LD        |
| USDA Prov. 2             | 607               | 88.35      | 28       | 80.11   | 2.62             | .014           | No LD > LD        |

*Note.* Did not apply = Did not submit an application for FRL; Denied = denied eligibility for FRL; Reduced = Eligible for reduced price lunch; Free = Eligible for free lunch; USDA Prov. 2 = attended a USDA-approved Provision 2 designated school and received free meals.

## Online Supplemental Materials V

### Cross-Tabulations of Students with School-identified LD and students identified as low achieving through researcher-based cut-off criteria

The following tables include cross-tabulations of students with a school-identified LD and students identified as having low achievement in reading comprehension at the 5<sup>th</sup>, 10<sup>th</sup>, or 20<sup>th</sup> percentiles in SAT-9/10 Reading Comprehension outcomes.

#### SLD versus Grade 1 Researcher-based criteria for SAT-9

The following tables show the cross-tabulations for students who were below the 5<sup>th</sup>, 10<sup>th</sup>, or 20<sup>th</sup> percentile in SAT-9 in grade 1 compared to students who had a school-identified LD.

**Table S5a.**

*School-identified LD versus 5<sup>th</sup> Percentile in SAT-9 Reading Comprehension in Grade 1*

|                          |       | 5th Percentile of SAT-9 in<br>Grade 1 |            |       |
|--------------------------|-------|---------------------------------------|------------|-------|
|                          |       | No                                    | Yes        | Total |
| School-<br>identified LD | No    | 13569                                 | 577        | 14146 |
|                          | Yes   | 415                                   | <b>212</b> | 627   |
| $\kappa = .265$          | Total | 13984                                 | 789        | 14773 |

**Table S5b.**

*School-identified LD versus 10<sup>th</sup> Percentile in SAT-9 Reading Comprehension in Grade 1*

|                          |       | 10th Percentile of SAT-9<br>in Grade 1 |            |       |
|--------------------------|-------|----------------------------------------|------------|-------|
|                          |       | No                                     | Yes        | Total |
| School-<br>identified LD | No    | 12994                                  | 1152       | 14146 |
|                          | Yes   | 333                                    | <b>294</b> | 627   |
| $\kappa = .239$          | Total | 13327                                  | 1446       | 14773 |

**Table S5c.**

*School-identified LD versus 20<sup>th</sup> Percentile in SAT-9 Reading Comprehension in Grade 1*

|                          |       | 20th Percentile of SAT-9<br>in Grade 1 |            | Total |
|--------------------------|-------|----------------------------------------|------------|-------|
|                          |       | No                                     | Yes        |       |
| School-<br>identified LD | No    | 12046                                  | 2100       | 14146 |
|                          | Yes   | 263                                    | <b>364</b> | 627   |
| $\kappa = .180$          | Total | 12309                                  | 2464       | 14773 |

### **SLD versus Grade 4 Researcher-based criteria for SAT-10**

The following tables show the cross-tabulations for students who are below the 5<sup>th</sup>, 10<sup>th</sup>, or 20<sup>th</sup> percentile in SAT-10 in grade 4. These tables represent students who were in the lowest part of the distribution in fourth grade compared to students who have a school-identified LD.

**Table S5d.**

*School-identified LD versus 5<sup>th</sup> Percentile in SAT-10 Reading Comprehension in Grade 4*

|                          |       | 5th Percentile of SAT-10<br>in Grade 4 |            | Total |
|--------------------------|-------|----------------------------------------|------------|-------|
|                          |       | No                                     | Yes        |       |
| School-<br>identified LD | No    | 13623                                  | 523        | 14146 |
|                          | Yes   | 414                                    | <b>213</b> | 627   |
| $\kappa = .280$          | Total | 14037                                  | 736        | 14773 |

**Table S5e.**

*School-identified LD versus 10<sup>th</sup> Percentile in SAT-10 Reading Comprehension in Grade 4*

|                          |       | 10th Percentile of SAT-10 in<br>Grade 4 |            | Total |
|--------------------------|-------|-----------------------------------------|------------|-------|
|                          |       | No                                      | Yes        |       |
| School-<br>identified LD | No    | 12855                                   | 1291       | 14146 |
|                          | Yes   | 342                                     | <b>285</b> | 627   |
| $\kappa = .211$          | Total | 13197                                   | 1576       | 14773 |

**Table S5f.**

*School-identified LD versus 20<sup>th</sup> Percentile in SAT-10 Reading Comprehension in Grade 4*

|                          |       | 20th Percentile of SAT-10<br>in Grade 4 |            |       |
|--------------------------|-------|-----------------------------------------|------------|-------|
|                          |       | No                                      | Yes        | Total |
| School-<br>identified LD | No    | 11623                                   | 2523       | 14146 |
|                          | Yes   | 261                                     | <b>366</b> | 627   |
| $\kappa = .149$          | Total | 11884                                   | 2889       | 14773 |

### **SLD versus students who met research-based criteria in both Grade 1 and Grade 4**

The following tables show the cross-tabulations for students who are below the 5<sup>th</sup>, 10<sup>th</sup>, or 20<sup>th</sup> percentile in SAT-9/10 in both grade 1 and grade 4. These represent students who stay in the lowest part of the distribution over these four years compared to students who have a school-identified LD.

**Table S5g.**

*School-identified LD versus students below the 5<sup>th</sup> percentile at both grades on SAT-9/10*

|                          |       | Below 5 <sup>th</sup> percentile at both grades |            |       |
|--------------------------|-------|-------------------------------------------------|------------|-------|
|                          |       | No                                              | Yes        | Total |
| School-<br>identified LD | No    | 14058                                           | 88         | 14146 |
|                          | Yes   | 516                                             | <b>111</b> | 627   |
| $\kappa = .253$          | Total | 14574                                           | 199        | 14773 |

**Table S5h.**

*School-identified LD versus students below the 10<sup>th</sup> percentile at both grades on SAT-9/10*

|                          |       | Below 10 <sup>th</sup> percentile at both grades |            |       |
|--------------------------|-------|--------------------------------------------------|------------|-------|
|                          |       | No                                               | Yes        | Total |
| School-<br>identified LD | No    | 13842                                            | 304        | 14146 |
|                          | Yes   | 457                                              | <b>170</b> | 627   |
| $\kappa = .283$          | Total | 14299                                            | 474        | 14773 |

**Table S5i.**

*School-identified LD versus students below the 20<sup>th</sup> percentile at both grades on SAT-9/10*

|                          |       | Below 20 <sup>th</sup> percentile at<br>both grades |            | Total |
|--------------------------|-------|-----------------------------------------------------|------------|-------|
|                          |       | No                                                  | Yes        |       |
| School-<br>identified LD | No    | 13351                                               | 795        | 14146 |
|                          | Yes   | 387                                                 | <b>240</b> | 627   |
| $\kappa = .249$          | Total | 13738                                               | 1035       | 14773 |

### **SLD versus students who improved their reading**

The following table shows the cross-tabulations for students who were below the 20<sup>th</sup> percentile in SAT-9 in grade 1, but who improved to be above the 20<sup>th</sup> percentile in grade 4. This table represents the students who improved their reading to be above the typical reading low-achievement definition of the 20<sup>th</sup> percentile seen in reading research compared to students who had a school-identified LD.

**Table S5j.**

*School-identified LD versus students who were below the 20<sup>th</sup> percentile in Grade 1 but above the 20<sup>th</sup> percentile in Grade 4*

|                          |       | Below 20 <sup>th</sup> percentile in Grade 1;<br>improved to above 20 <sup>th</sup> in Grade 4 |            | Total |
|--------------------------|-------|------------------------------------------------------------------------------------------------|------------|-------|
|                          |       | No                                                                                             | Yes        |       |
| School-<br>identified LD | No    | 12841                                                                                          | 1305       | 14146 |
|                          | Yes   | 503                                                                                            | <b>124</b> | 627   |
| $\kappa = .041$          | Total | 13344                                                                                          | 1429       | 14773 |

### **SLD versus late-emerging low achievers in reading**

The following table show the cross-tabulations for students who did not meet low-achievement criteria in grade 1, but who met the definition for low-achievement in reading by being below the 20<sup>th</sup> percentile on SAT-10 in Grade 4. This table represents the students who had



late-emerging low achievement in reading as those with normal reading in grade 1 who regressed below the 20<sup>th</sup> percentile in SAT-10 by fourth grade.

**Table S5k.**

*School-identified LD versus students who were above the 20<sup>th</sup> percentile in Grade 1 but regressed below the 20<sup>th</sup> percentile in Grade 4*

|                      |       | No problem Grade 1; Below 20 <sup>th</sup> in Grade 4 |            | Total |
|----------------------|-------|-------------------------------------------------------|------------|-------|
|                      |       | No                                                    | Yes        |       |
| School-identified LD | No    | 12418                                                 | 1728       | 14146 |
|                      | Yes   | 501                                                   | <b>126</b> | 627   |
| $\kappa = .065$      | Total | 12919                                                 | 1854       | 14773 |

### Online Supplemental Materials VI

#### Sample Statistics for Students below 20<sup>th</sup> percentile, Students with a school-identified LD, and students who were both SLD and below 20<sup>th</sup> percentile

|           | Below 20th Percentile |        |       | SLD Only |        |       | SLD & Below 20th Percentile |        |       |
|-----------|-----------------------|--------|-------|----------|--------|-------|-----------------------------|--------|-------|
|           | <i>n</i>              | mean   | SD    | <i>n</i> | mean   | SD    | <i>n</i>                    | mean   | SD    |
| SAT - G1  | 331                   | 500.53 | 18.99 | 375      | 517.54 | 36.39 | 137                         | 485.76 | 22.01 |
| SAT - G2  | 331                   | 552.58 | 20.58 | 266      | 571.04 | 37.70 | 137                         | 534.42 | 20.96 |
| SAT - G3  | 331                   | 577.85 | 18.63 | 470      | 598.43 | 38.60 | 137                         | 561.60 | 19.88 |
| SAT - G4  | 331                   | 598.24 | 20.71 | 462      | 619.49 | 37.70 | 137                         | 580.74 | 22.15 |
| PPVT - K  | 315                   | 67.72  | 14.74 | 269      | 79.46  | 16.82 | 132                         | 73.28  | 17.38 |
| PPVT - G1 | 320                   | 81.75  | 14.85 | 256      | 94.40  | 17.90 | 132                         | 87.26  | 18.14 |
| PPVT - G2 | 328                   | 94.67  | 15.42 | 271      | 105.39 | 18.70 | 134                         | 98.58  | 17.52 |
| PPVT - G3 | 283                   | 108.30 | 16.84 | 215      | 117.57 | 18.01 | 91                          | 110.10 | 19.31 |

*Note.* Sample sizes fluctuate due to missing data. SLD = school-identified LD students; SAT = Stanford achievement test; PPVT = Peabody Picture Vocabulary Test.

Non-SLD Students who were below the 20<sup>th</sup> percentile started with higher SAT scores and maintained higher SAT scores than students who were SLD only or who were both SLD and also below the 20<sup>th</sup> percentile. Students who were SLD had higher vocabulary scores compared to non-SLD students below the 20<sup>th</sup> percentile and compared to SLD students who were persistently poor readers. Non-SLD students who were below the 20<sup>th</sup> percentile on SAT had the lowest vocabulary scores and maintained lower vocabulary scores across K-3<sup>rd</sup> grade.

## Online Supplemental Materials VII

### Model Comparison between Students with a School-Identified LD and Students persistently below the 20<sup>th</sup> percentile in SAT-9/10

A group of readers who were persistently below the 20<sup>th</sup> percentile at all four SAT-9/10 measurements was selected for a model comparison to students with a school-identified LD. A subsample of 331 students were selected who scored below the 20<sup>th</sup> percentile on SAT-9/10 in all of first through fourth grades. These students were compared to the model of students with an LD ( $n = 627$ ).

As was done for the models within the manuscript, the model for students below the 20<sup>th</sup> percentile was fit separately from the model for students with an LD to determine the cross-lagged relations between vocabulary knowledge and reading comprehension. Four models were fit to this data: 1) a bidirectional coupling model, where vocabulary predicted change in reading comprehension and reading comprehension predicted change in vocabulary; 2) a unidirectional model where vocabulary predicted change in reading comprehension, but not vice versa; 3) a second unidirectional model, whereby reading comprehension predicted change in vocabulary but not vice versa, and 4) a no-coupling model, where all of the cross-lagged pathways were set to zero.

Results of the model comparison for persistently poor readers below the 20<sup>th</sup> percentile showed that although the bidirectional and two unidirectional models fit well, they fit equally as well as a model fixing all cross-lagged pathways to zero ( $\chi^2 [25] = 40.17, p = .015$ ; CFI = .98; TLI = .97; RMSEA = .043 [90% C.I. .014 - .066]). Parameter estimates from this model are presented in Table S7b.

Students persistently below the 20<sup>th</sup> percentile started Kindergarten ( $\mu_v = -1.57$ ) half a standard deviation below the mean of students who were school-identified as having an LD ( $\mu_v = -1.07$ ). Both groups of students started low in reading comprehension ( $\mu_r = -1.39$ ;  $-1.24$ ), but the linear slope for students with an LD was slightly larger ( $\eta_r = 0.65$ ) than persistently poor readers ( $\eta_r = 0.52$ ). The auto-regressive parameter for persistently poor readers was not significantly different from zero ( $p = .806$ ). The cross-lagged pathways were fixed to zero for model parsimony. For reference, the cross-lagged pathway from vocabulary to change in reading comprehension ( $\gamma_{rcv} = .16$ ,  $se = .21$ ,  $p = .450$ ), and the cross-lagged pathway from reading comprehension to change in vocabulary knowledge ( $\gamma_{vrc} = 0.06$ ,  $se = .05$ ,  $p = .245$ ) were not significant in the bidirectional model for persistently poor readers.

In summary, these 331 students who were persistently poor readers not only started First Grade slightly lower in reading comprehension, but also started Kindergarten with lower vocabulary knowledge than their peers who had school-identified LD. These persistently poor readers represent a different subsample of the Title-I sample of students, as these are students who were not identified by their teachers or caregivers as having a learning disability.

**Table S7a.***Model fit statistics for the Bivariate Latent Change Score Models*

| Model                                                                             | $\chi^2$     | df        | SCR         | RMSEA       | 90% CI             | CFI        | TLI        | SRMR       | nBIC           |
|-----------------------------------------------------------------------------------|--------------|-----------|-------------|-------------|--------------------|------------|------------|------------|----------------|
| <i>Persistently poor readers below the 20<sup>th</sup> percentile in SAT-9/10</i> |              |           |             |             |                    |            |            |            |                |
| Model S7a                                                                         | 40.02        | 23        | 1.12        | .047        | .021 - .071        | .97        | .97        | .06        | 3999.25        |
| Model S7b                                                                         | 42.39        | 24        | 1.09        | .048        | .023 - .071        | .97        | .97        | .06        | 3997.90        |
| Model S7c                                                                         | 39.18        | 24        | 1.18        | .044        | .015 - .068        | .98        | .97        | .05        | 3997.96        |
| <b>Model S7d</b>                                                                  | <b>40.17</b> | <b>25</b> | <b>1.17</b> | <b>.043</b> | <b>.014 - .066</b> | <b>.98</b> | <b>.97</b> | <b>.05</b> | <b>3996.06</b> |
| <i>LD Students (same single-group models as the manuscript)</i>                   |              |           |             |             |                    |            |            |            |                |
| Model 2A                                                                          | 49.60        | 22        | 1.13        | .045        | .028 - .061        | .98        | .97        | .04        | 7682.38        |
| Model 2B                                                                          | 46.56        | 23        | 1.22        | .040        | .023 - .057        | .99        | .98        | .04        | 7680.12        |
| Model 2C                                                                          | 51.62        | 23        | 1.10        | .045        | .028 - .061        | .98        | .98        | .04        | 7679.92        |
| <b>Model 2D</b>                                                                   | <b>47.27</b> | <b>24</b> | <b>1.21</b> | <b>.039</b> | <b>.022 - .056</b> | <b>.99</b> | <b>.98</b> | <b>.04</b> | <b>7677.31</b> |

Note.  $\chi^2$  = Chi-Square test of model fit; df = degrees of freedom. SCR = scaling correction factor for Satorra-Bentler chi-square difference testing; RMSEA = Root Mean-Squared Error of Approximation. CI = Confidence interval. CFI = Comparative Fit Index. TLI = Tucker-Lewis Index. SRMR = standardized root mean square residual; nBIC = Sample size adjusted Bayesian information criteria.

**Table S7b.***Parameters for the supplemental multiple group LCS model*

| <i>Parameter</i>                                             | Below 20 <sup>th</sup> %-ile<br><i>n</i> = 331 |                    | With an LD<br><i>n</i> = 627 |           |
|--------------------------------------------------------------|------------------------------------------------|--------------------|------------------------------|-----------|
|                                                              | <i>Vocab</i>                                   | <i>RC</i>          | <i>Vocab</i>                 | <i>RC</i> |
| Initial mean status, $\mu_{intercept}$                       | -1.57***                                       | -1.39***           | -1.07***                     | -1.24***  |
| Linear slope, $\eta_{slope}$                                 | 0.78***                                        | 0.52***            | 0.69***                      | 0.65***   |
| Auto-Regression, $\beta$                                     | 0.01 <sup>ns</sup>                             | -0.42***           | -0.11**                      | -0.38***  |
| Cross-lagged effects, $\gamma$ :                             |                                                |                    |                              |           |
| RC $\rightarrow \Delta$ Vocab                                |                                                | 0                  |                              | 0         |
| Vocab $\rightarrow \Delta$ RC                                |                                                | 0                  |                              | 0         |
| Variances:                                                   |                                                |                    |                              |           |
| Intercepts, $\sigma_0^2$                                     | 0.49***                                        | 0.07***            | 0.78***                      | 0.40***   |
| Slopes, $\sigma_s^2$                                         | 0.02*                                          | 0.02***            | 0.04***                      | 0.11***   |
| Residual Errors, $\sigma_e^2$                                | 0.24***                                        | 0.12***            | 0.25***                      | 0.21***   |
| Covariances:                                                 |                                                |                    |                              |           |
| Vocab $\mu_{intercept} \leftrightarrow$ Vocab $\mu_{slope}$  |                                                | -.12 <sup>ns</sup> |                              | .39*      |
| Vocab $\mu_{intercept} \leftrightarrow$ RC $\mu_{intercept}$ |                                                | -.04 <sup>ns</sup> |                              | .34***    |
| Vocab $\mu_{intercept} \leftrightarrow$ RC $\mu_{slope}$     |                                                | -.09 <sup>ns</sup> |                              | .32***    |
| RC $\mu_{intercept} \leftrightarrow$ RC $\mu_{slope}$        |                                                | .60***             |                              | .53***    |
| RC $\mu_{intercept} \leftrightarrow$ Vocab $\mu_{slope}$     |                                                | .33*               |                              | .19*      |
| Vocab $\mu_{slope} \leftrightarrow$ RC $\mu_{slope}$         |                                                | .27 <sup>ns</sup>  |                              | .52***    |

*Note.* Vocab= PPVT vocabulary; RC = SAT reading comprehension. <sup>ns</sup> = not significant, \*\*\* =  $p < .001$ ; \*\* =  $p < .01$ ; \* =  $p < .05$ . Residual variances were fixed across groups; all other parameters were freely estimated across groups.
